# Supplementary material
Source: PubMed Central journal article supplement (PMC3220576)

| Receptor Expressed    | Bmax<br>(fmol/ $\mu$ g) | SEM  |  | Kd (nM) | SEM  |
|-----------------------|-------------------------|------|--|---------|------|
| F-MOR                 | 1.071                   | 0.16 |  | 0.32    | 0.22 |
| F-MOR-0cK             | 1.065                   | 0.07 |  | 0.28    | 0.09 |
| F-MOR $\Delta$ 17     | 2.076                   | 0.16 |  | 0.31    | 0.11 |
| F-MOR $\Delta$ 17-0cK | 2.081                   | 0.14 |  | 0.35    | 0.11 |

Supplemental Table 1 – Receptor expression levels of HEK293 stable cell lines

Receptor levels were measured by saturation binding to [3H]-diprenorprine, and curves fitted using nonlinear regression (GraphPad Prism).

## Supplemental Figures

### **Supplemental Figure 1. Colocalization of receptors with early and then late endosomes.**

HEK293 cells expressing F-MOR $\Delta$ 17 (A and C) or F-MOR $\Delta$ 17-0cK (B and D) were treated with 10 $\mu$ M DADLE for 30 (A and B) or 90 minutes (C and D) before being fixed and stained. A and B) Cells were stained with anti-FLAG (magenta, left panel) to label receptor and anti-EEA1 (green, middle panel). C and D) Cells were stained with anti-opioid receptor (magenta, left panels) and anti-LAMP1 (green, middle panels).

### **Supplemental Figure 2. Image stack of enlarged Rab5-Q79L endosomes.**

HEK293 cells were transiently transfected with CFP-Rab5Q79L and either F-MOR $\Delta$ 17-GFP (A) or F-MOR $\Delta$ 17-0cK-GFP (B), and replated onto coverslips before treatment for 90 minutes with 10 $\mu$ M DADLE. Cells were then imaged by spinning disc confocal microscopy as described in the methods section. Shown are representative image stacks of either GFP (top) or FLAG (middle) fluorescence to localize the N or C termini respectively. Cross sections of the endosome were taken every 0.8 $\mu$ m, scale bars represent 10 $\mu$ m.

### **Supplemental Figure 3. Specific lysine residues within the first intracellular loop mediate transfer to ILVs.**

A and B) Cartoon depicting the F-MOR $\Delta$ 17-1st loop 2K/R-GFP (A) or F-MOR $\Delta$ 17-0cK-1st loop K-GFP (B) to show position of the lysine (**K**) and arginine (**R**) residues and the GFP. C and D) HEK293 cells were transiently transfected with CFP-Rab5Q79L and either F-MOR $\Delta$ 17-1st loop 2K/R-GFP (C) or F-MOR $\Delta$ 17-0cK-1st loop K-GFP (D), and replated onto coverslips before treatment for 90 minutes with 10 $\mu$ M DADLE. Cells were then imaged by spinning disc confocal microscopy as described in the methods section. Shown are representative still images of the representative acquired image series, scale bars are 10 $\mu$ m. C and D) Line scan analysis to quantify involution was performed as described (see Methods and Fig.5 legend), and data of line scan analysis compiled. E) shows mean and SEM, F) shows the distribution of internal fluorescence values \*\*\* p<0.001, Student's t-test, n=100 endosomes for each receptor,  $\geq 12$  cells).

# Supplemental 1

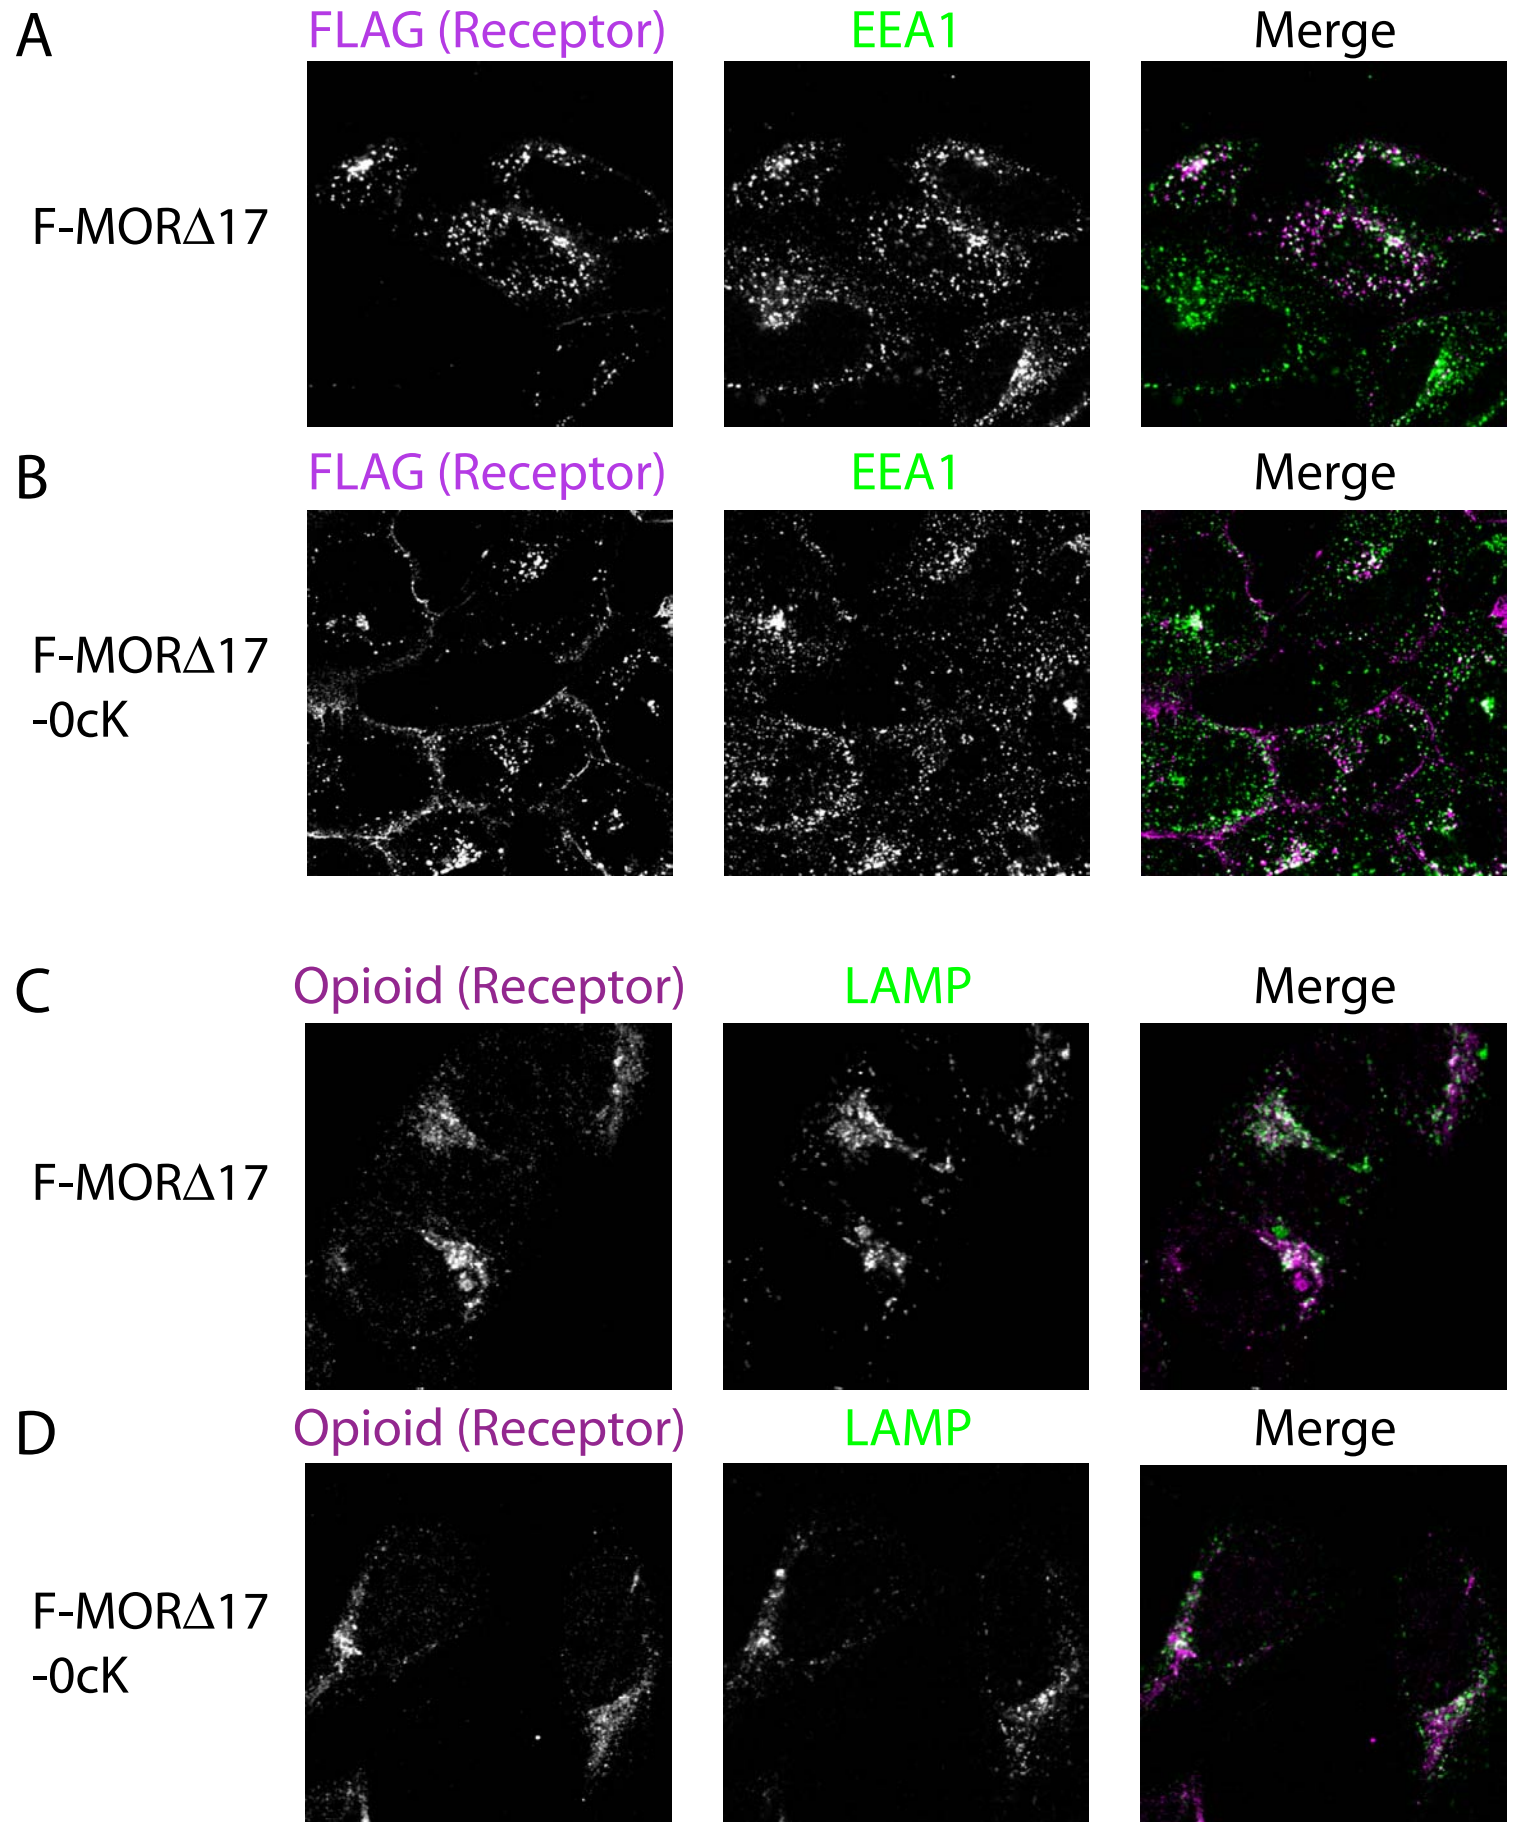



# Supplemental 2B

F-MOR $\Delta$ 17-0cK-GFP - GFP

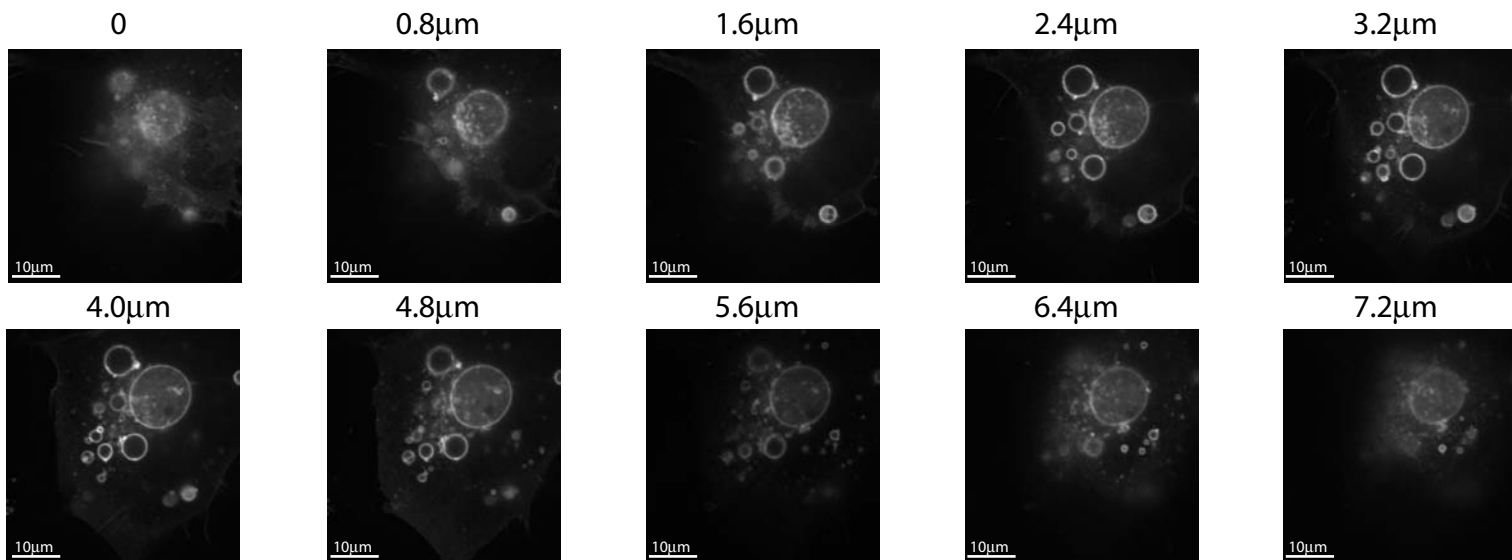

F-MOR $\Delta$ 17-0cK-GFP - M1-594

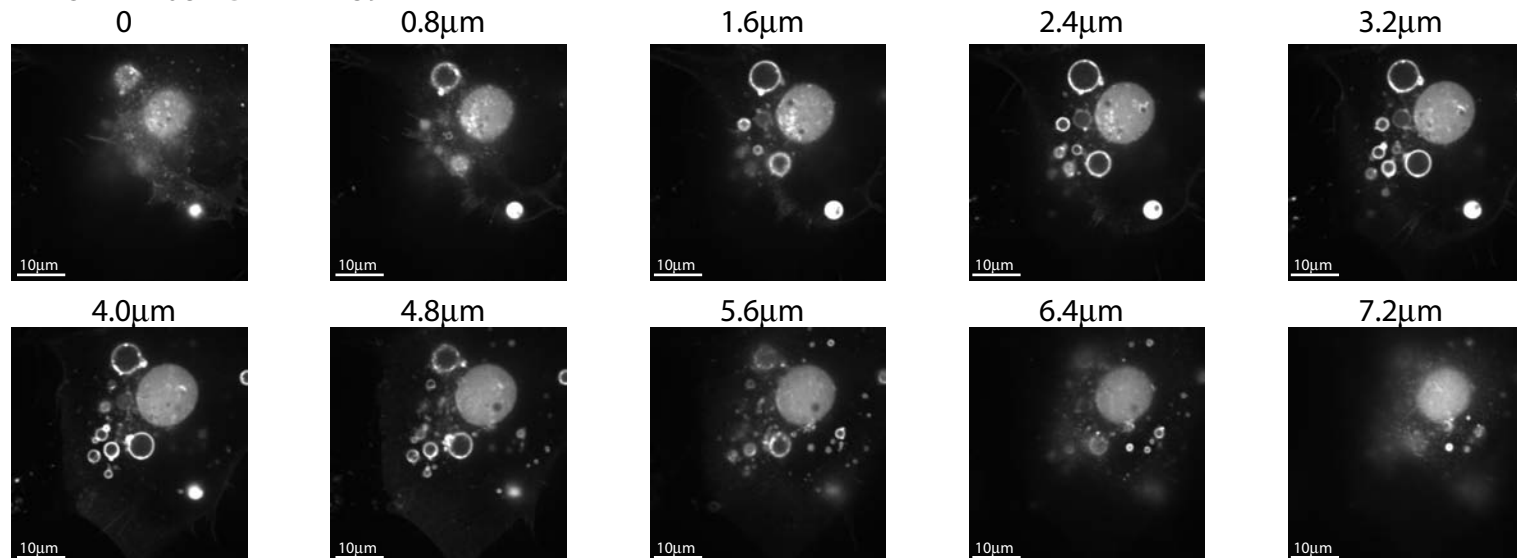

F-MOR $\Delta$ 17-0cK-GFP - Merge

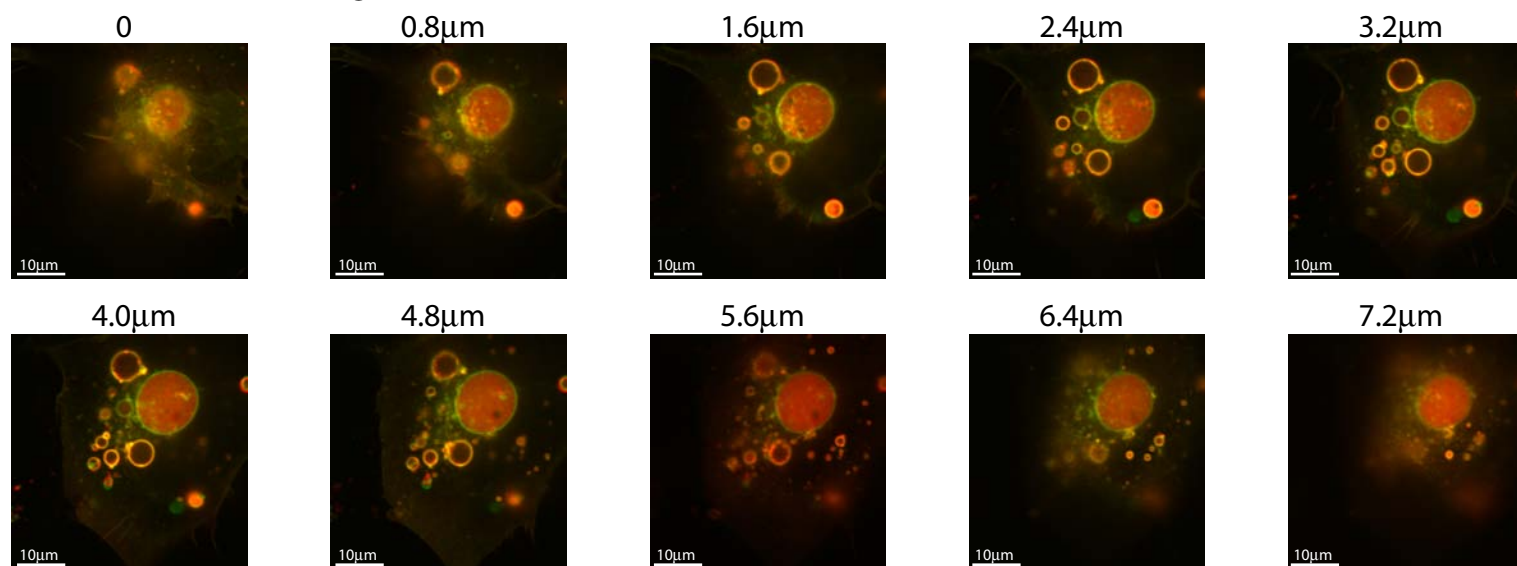

# Supplemental 3

A

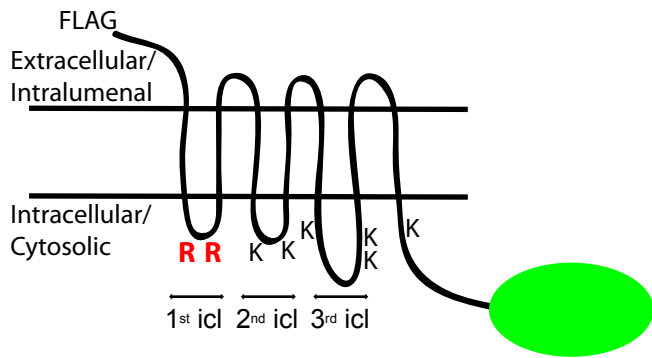

B

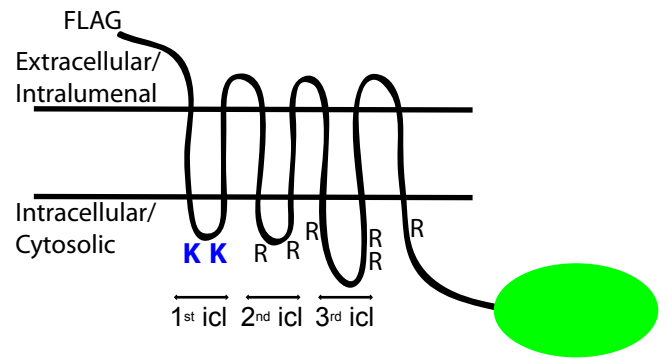

C

F-MOR $\Delta$ 17-2K/R-GFP

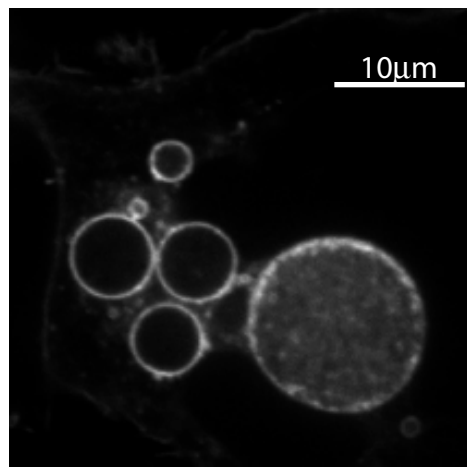

D

F-MOR $\Delta$ 17-0cK-1st loop K-GFP

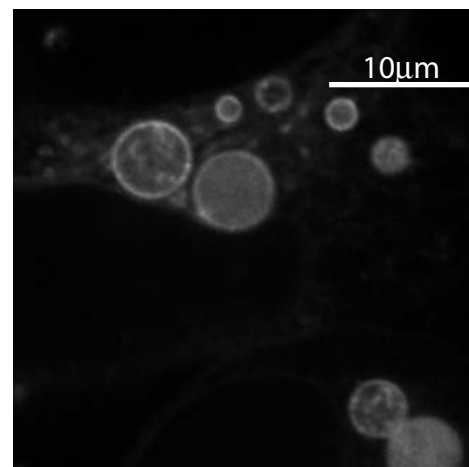

E

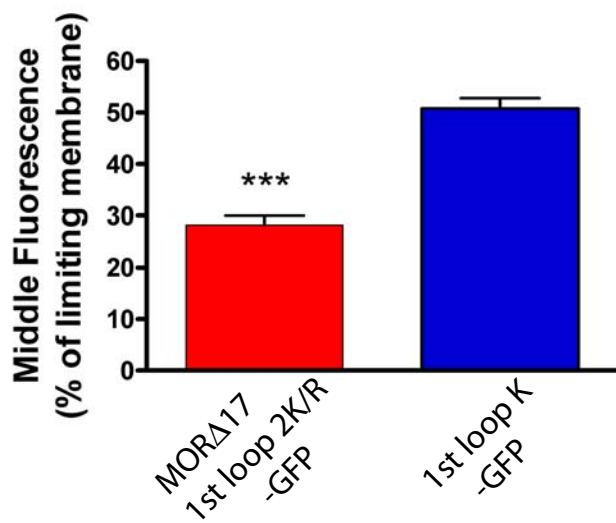

F

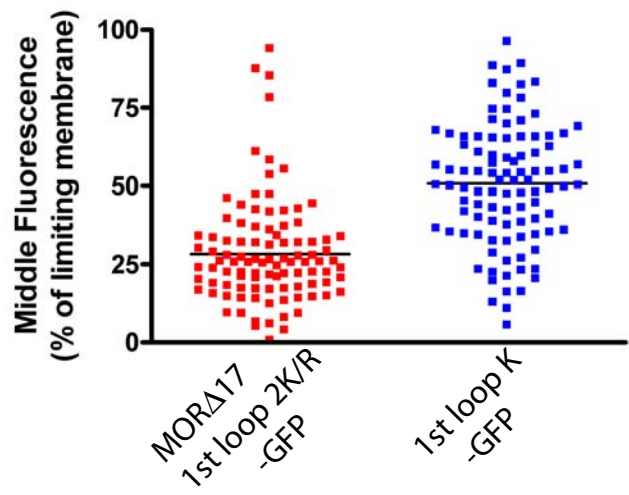

Supplement: supp_M111.288555_jbc.M111.288555-1.pdf [file supp_M111.288555_jbc.M111.288555-1.pdf]
